# Supplementary material for: Transfer of Axial Chirality to the Nanoscale Endows Carbon Nanodots with Circularly Polarized Luminescence
Source: PubMed Central journal article supplement — Angew Chem Int Ed Engl. 2022 May 5;61(26):e202202397. doi: 10.1002/anie.202202397 (PMC9320872; doi:10.1002/anie.202202397), 2022-05-05
Supplement: ANIE-61-0-s001.pdf [file ANIE-61-0-s001.pdf]

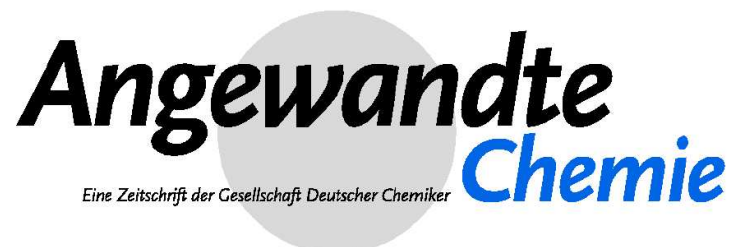

## Supporting Information

### **Transfer of Axial Chirality to the Nanoscale Endows Carbon Nanodots with Circularly Polarized Luminescence**

*S. Di Noja, F. Amato, F. Zinna, L. Di Bari\*, G. Ragazzon\*, M. Prato\**

**Table of Contents**

|                                                                                            |    |
|--------------------------------------------------------------------------------------------|----|
| Table of Contents                                                                          | 2  |
| Experimental Procedure                                                                     |    |
| A. General Information                                                                     | 3  |
| B. Synthesis of Carbon Nanodots                                                            | 4  |
| Photophysical and chiroptical characterization of CNDs-1                                   | 6  |
| Atomic Force Microscopy of CNDs- <i>R</i> -1                                               | 6  |
| Screening of doping agents                                                                 | 7  |
| Survey of synthetic parameters                                                             | 8  |
| Size-Exclusion Chromatography analysis of CNDs- <i>S</i> -2                                | 9  |
| Morphological characterization of CNDs- <i>R</i> -2                                        | 9  |
| X-Ray Photoelectron Spectroscopy of CNDs-2                                                 | 10 |
| X-Ray Photoelectron Spectroscopy of CNDs-1                                                 | 12 |
| Fourier-Transform Infrared Spectroscopy characterization                                   | 13 |
| Structural characterization of CNDs- <i>R</i> -2                                           | 14 |
| Photophysical characterization of CNDs-2 in multiple solvents                              | 15 |
| Optical characterization of CNDs- <i>R</i> -2                                              | 15 |
| Chiroptical characterization of <i>R</i> - and <i>S</i> -1,1'-binaphthyl-2,2'-diamine      | 16 |
| Quantum Yield measurements of CNDs-2                                                       | 16 |
| $g_{lum}$ measurements of CNDs-2                                                           | 16 |
| Circularly Polarized Luminescence of CNDs-2 in DMF                                         | 17 |
| Synthesis of Carbon Nanodots in absence of chiral diamine (CNDs-BQ)                        | 17 |
| Circularly Polarized Luminescence of <i>R</i> - and <i>S</i> -1,1'-binaphthyl-2,2'-diamine | 18 |
| Thermogravimetric analysis of CNDs- <i>R</i> -2                                            | 18 |
| Lifetime measurements of CNDs-2                                                            | 19 |
| References                                                                                 | 20 |
| Author Contributions                                                                       | 20 |

## Experimental Procedures

### A. General information

Microwave synthesis was performed on a CEM Discover-SP, using 10 mL glass microwave vials. The synthetic protocols could be reproduced also on an Anton Paar 400 microwave reactor. NMR spectra were recorded on Varian 400 spectrometer ( $^1\text{H}$ : 400 MHz). UV-Vis measurements were carried out on PerkinElmer Lambda 35 UV-Vis spectrophotometer. All the spectra were recorded at room temperature using 10 mm path-length cuvettes. Atomic force microscopy (AFM) images were obtained with a Nanoscope IIIa, VEECO Instruments. As a general procedure, AFM analyses were performed using tapping mode with a HQ:NSC19/ALBS probe (80 kHz; 0.6 N/m) (MikroMasch) from drop cast of samples in ethyl acetate diluted solution (concentration in the order of  $\mu\text{g/mL}$ ) on an exfoliated mica substrate. The obtained AFM images were analyzed in S3 Gwyddion 2.58, using Profile extraction tool and Find peaks function. Statistical analysis was carried out on one hundred nanoparticles. TEM images were acquired on Jeol, JEM 2100, Japan, at 200 kV. The TEM is equipped with Gatan camera and DigitalMicrographs software. Samples were drop cast from an ethyl acetate diluted solution (concentration in the order of  $\mu\text{g/mL}$ ) on top of a copper grid (copper-grid-supported carbon film), purchased from Ted Pella, Inc. Finally, the solvent was removed in vacuum. ATR-Fourier-transform infrared spectroscopy was performed on a Shimadzu IRAffinity-1S equipped with a QATR-10 with diamond crystal. Typically, spectra were recorded with 4  $\text{cm}^{-1}$  resolution and 60 scans accumulation. Electronic Circular Dichroism (ECD) spectra were recorded using Jasco J-810 at room temperature (20 °C). Conditions were as follows: scanning rate 100 nm/min, data pitch 1 nm, Digital Integration Time (D.I.T.) 2 s, 3 accumulations. Luminescence lifetimes were measured with an Edinburgh Instruments FS5 time-correlated single-photon counting spectrofluorimeter, exciting the sample at 375 nm with a picosecond pulsed diode laser (EPL-375 Edinburgh Instruments).

For thin layer chromatography (TLC) analysis, Merck pre-coated TLC plates (silica gel 60 GF254, 0.25 mm) were employed, using UV light as the visualizing agent (254 nm). For filtration, Merck Omnipore 0.1  $\mu\text{m}$  PTFE Membrane filters (25 mm) were employed. Organic solutions were concentrated under reduced pressure on a Büchi rotatory evaporator. X-Ray Photoelectron Spectroscopy experiments were performed on a SPECS Sage HR 100 spectrometer with a non-monochromatized X ray source (Magnesium  $\text{K}\alpha$  line of 1253.6 eV energy and 252 W), placed perpendicular to the analyzer axis and calibrated using the 3d5/2 line of Ag with a full width at half maximum (FWHM) of 1.1 eV. The selected resolution for the spectra was 15 eV of Pass Energy and 0.15 eV/step. All measurements were made in an ultra-high vacuum (UHV) chamber at a pressure around  $8 \cdot 10^{-8}$  mbar. Samples were prepared drop casting a dispersion of the samples in chloroform on gold slides prepared in house and allowing to dry overnight. CasaXPS software (version 2.3.16 PR1.6) was used for data analysis. Survey spectra were employed to calculate relative atomic composition of all elements present in the samples. General procedures and materials. Carbon Nanodots (CNDs) were synthesized in glass microwave vials. Commercial reagents and solvents were used as purchased from Sigma-Aldrich or VWR and used as received, without further purification, unless otherwise stated. Citric acid, (S)-1,1'-binaphthyl-2,2'-diamine, (R)-1,1'-binaphthyl-2,2'-diamine and 1,4-benzoquinone are all commercially available. Quantum yield (QY) measurements were performed with quinine sulphate in 0.10 M  $\text{H}_2\text{SO}_4$  (literature quantum yield 0.54 at 360 nm)<sup>[1]</sup> as standard and CNDs-S-2 or CNDs-R-2 in  $\text{CHCl}_3$  solution. The fluorescence quantum yields were calculated according to the Equation 1

$$\Phi_x = \Phi_{st} \frac{I_x A_{st} n_x^2}{I_{st} A_x n_{st}^2}$$

$I$  is the measured integrated fluorescence emission intensity.  $A$  is the absorbance value,  $n$  is the refractive index of the solvent and  $\Phi$  is the quantum yield. The index  $x$  is referred to the sample, and the index  $st$  is referred to the standard. The absorbance of the standard and the sample were measured with  $A < 0.1$  at the excitation wavelength. The quantum yield was calculated at different excitation wavelengths by taking advantage of the following proportion:

$$\Phi_{exc} \propto \frac{I_{exc}}{A_{exc}}$$

Where the subscript  $exc$  indicates a specific excitation wavelength. The estimated experimental error on QY is 25%.

CPL measurements were carried out with a home-made spectrofluoropolarimeter.<sup>[2]</sup> In the current configuration the setup is optimized for visible measurements (400-750 nm), while efficient measurements in the UV region are out of range, due to emission monochromator grating efficiency. This experimental limitation prevented the observation of CPL from **CNDs-1** which may also be CPL-active. The samples were dissolved in  $\text{CH}_2\text{Cl}_2$  and displayed absorbance 0.25 at 420 nm. A 365 nm LED was used as the excitation source, employing a 90° geometry. The excitation light was linearly polarized parallel to the detection direction. Acquisition parameters were: band-width ~10 nm, scan-speed 1 nm/sec, integration time 8 sec, photomultiplier voltage 600 V, accumulations 20 for spectra in  $\text{CH}_2\text{Cl}_2$  and 10 for spectra in DMF.

$\text{CHCl}_3$  was employed in the optical characterization because of its ease of processing (lower boiling point) and UV-cutoff at shorter wavelengths with respect to DMF. This allowed also consistency with NMR characterization, performed in  $\text{CDCl}_3$ . The CPL measurements were performed in DCM, which offers a low viscosity, beneficial in increasing the tumbling rate of the molecules therefore minimizing photoselection. Photoselection may indeed affect measurements since the rotational correlation time (estimated being 2 to 3 ns on the basis of their size) in  $\text{CHCl}_2$  is similar to recorded luminescence lifetime (2.7 ns for **CNDs-2**, *vide infra*, Fig. S31,32 and Table S6). Anyway, we note that even a much polar and completely different solvent such as DMF gives similar CPL spectra (*vide infra*, Fig S26), indicating that the solvent nature does not significantly change the CPL response.

## SUPPORTING INFORMATION

## B. Synthesis of Carbon Nanodots

## CNDs-S-1 and CNDs-R-1 (CNDs-1)

Either (*S*)- or (*R*)-1,1'-binaphthyl-2,2'-diamine (75 mg, 0.264 mmol, 1 eq.) and citric acid (76 mg, 0.396 mmol, 1.5 eq.) were dissolved in *N,N*-dimethylformamide (DMF) (250  $\mu$ L) and then heated at 240° C, 80 psi and 200 W for 300 seconds. In the process of microwave heating, the solution changes color from pale pink to brown as a result of formation of CNDs-2. The solution was diluted with DMF and filtered through a 0.1  $\mu$ m microporous membrane to remove possible large aggregates. The solution was collected and 50 mL of cold diethyl ether (Et<sub>2</sub>O) were added in order to induce CNDs' precipitation. The precipitate was filtered through a 0.1  $\mu$ m microporous membrane and washed with 50 mL of Et<sub>2</sub>O, giving a pale pink powder (CNDs-S-1: 18 mg, CNDs-R-1: 17 mg).

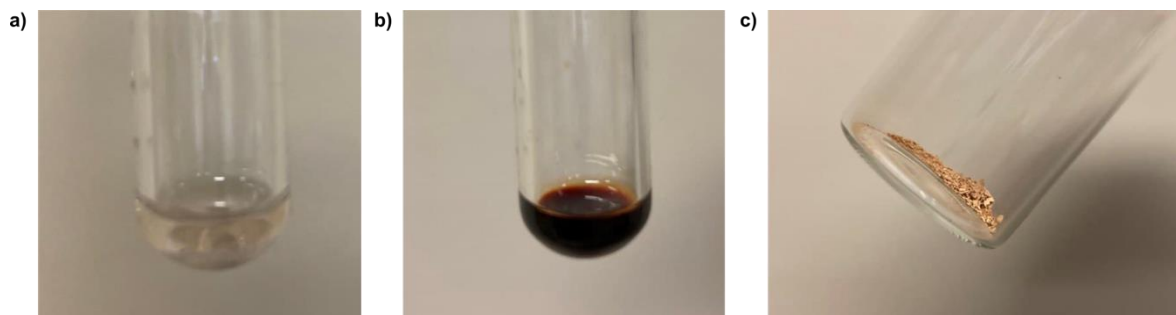

**Figure S1.** Photographs of the vials (a) before and (b) after microwave-heating process and (c) the final **CNDs-1** after precipitation in cold Et<sub>2</sub>O and subsequent filtration.

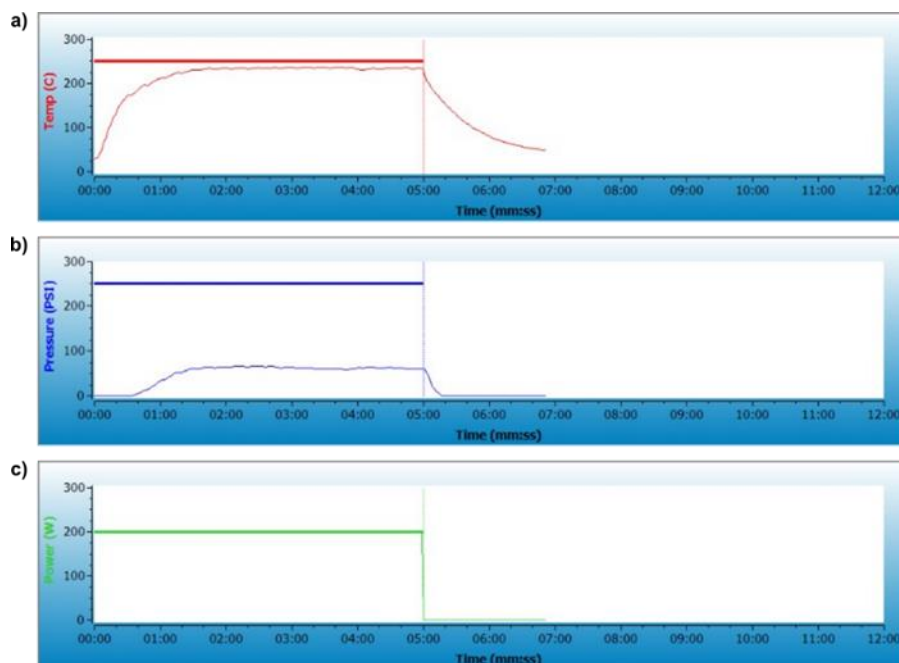

**Figure S2.** Typical (a) temperature, (b) pressure and (c) power profiles recorded during microwave-heating process for the synthesis of **CNDs-1**.

## SUPPORTING INFORMATION

**CNDs-S-2 and CNDs-R-2 (CNDs-2)**

Either (*S*)- or (*R*)-1,1'-binaphthyl-2,2'-diamine (75 mg, 0.264 mmol, 1 eq.) and citric acid (76 mg, 0.396 mmol, 1.5 eq.) 1,4-benzoquinone (28.5 mg, 0.264 mmol, 1 eq.) were dissolved in *N,N*-dimethylformamide (DMF) (250  $\mu$ L) and then heated at 240 $^{\circ}$  C, 100 psi and 200 W for 300 seconds. In the process of microwave heating, the solution changes color from burgundy to dark brown as a result of formation of CNDs. The solution was diluted with DMF and filtered through a 0.1  $\mu$ m microporous membrane to remove possible large aggregates. The solution was collected and 50 mL of cold diethyl ether ( $\text{Et}_2\text{O}$ ) were added in order to induce CNDs' precipitation. The precipitate was filtered through a 0.1  $\mu$ m microporous membrane and washed with 50 mL of  $\text{Et}_2\text{O}$ , giving a brown powder (CNDs-S: 41 mg, CNDs-R: 42 mg). The effective removal of side products is confirmed by TLC. Cyclohexane:ethyl acetate 7:3 or dichloromethane:methanol 95:5 were employed. Using the former eluent, CNDs have an  $R_f$  of 0, while other impurities can be identified only in the crude (at higher  $R_f$ ), but not in the final product. The latter eluent reveals a uniform, broad, stripe with  $R_f$  of ca. 0.5. It is possible to solubilize atropisomeric CNDs in water at spectroscopic concentrations by dissolving them first in DMSO and then adding an aliquot of the obtained solution in water.

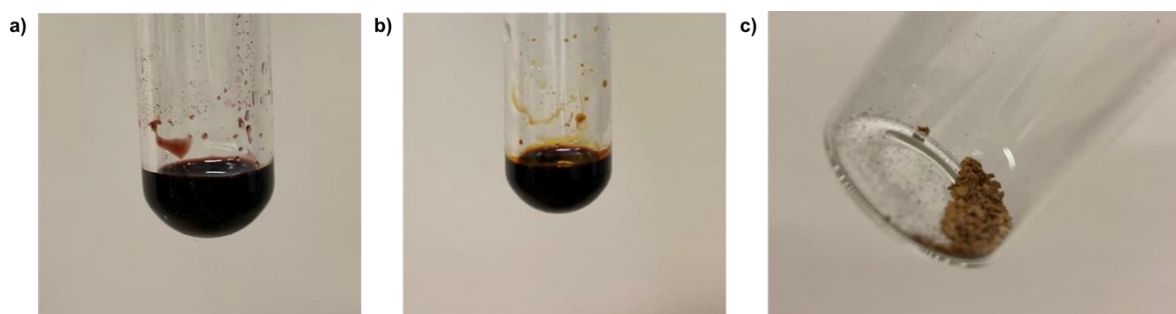

**Figure S3.** Photographs of the vials (a) before and (b) after microwave-heating process and (c) the final **CNDs-2** after precipitation in cold  $\text{Et}_2\text{O}$  and subsequent filtration.

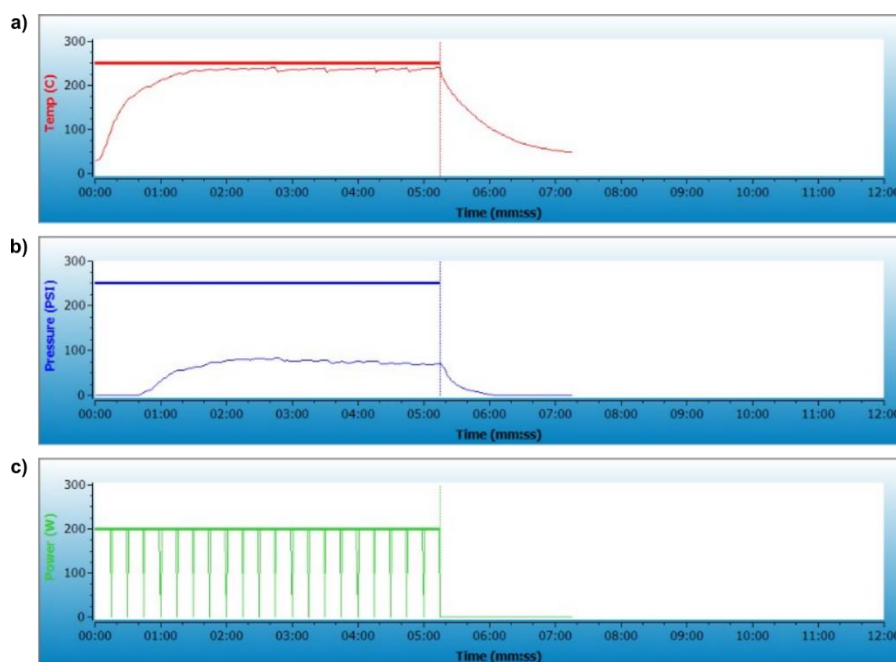

**Figure S4.** A typical (a) temperature, (b) pressure and (c) power profiles recorded during microwave-heating process for the synthesis of **CNDs-2**.

## SUPPORTING INFORMATION

## Results and Discussion

## Photophysical and chiroptical characterization of CNDs-1

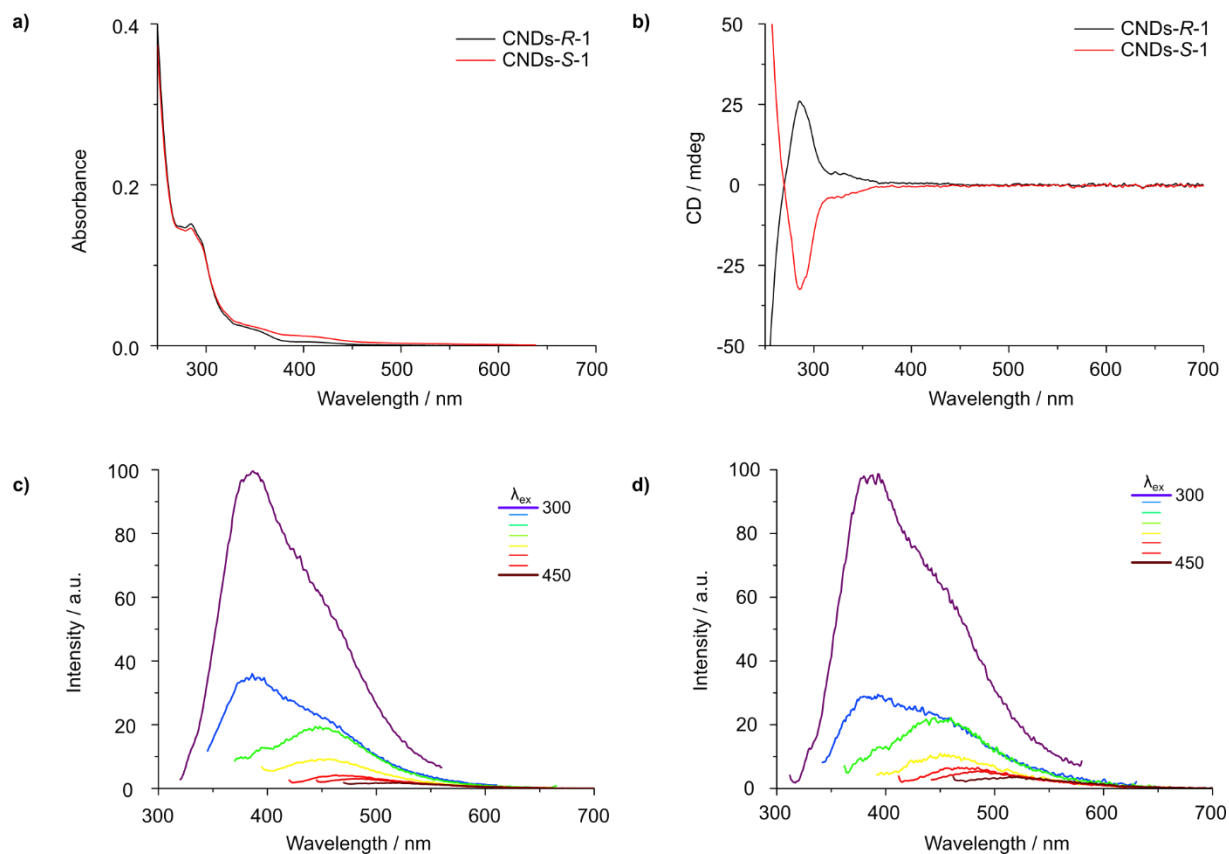

**Figure S5.** (a) UV-Vis spectra of **CNDs-R-1** (black line) and **CNDs-S-1** (red line); (b) ECD spectra of **CNDs-R-1** (black line) and **CNDs-S-1** (red line); (c) and (d) Fluorescence emission spectra of **CNDs-R-1** and **CNDs-S-1** recorded at different excitation wavelengths. Experiments performed in  $\text{CHCl}_3$  at r.t., at concentrations between 0.01 and 0.05 mg/mL.

For both **CNDs-1**, at 287 nm,  $g_{\text{abs}} = |8.0| \times 10^{-4}$ . A significantly higher  $g_{\text{abs}}$  in **CNDs-1** with respect to **CNDs-2** points at  $g_{\text{abs}}$  values being governed by variations in the dihedral angle of the binaphthyl unit rather than thermal racemization.<sup>[3]</sup> Indeed, the reaction temperature profiles are very similar for **CNDs-1** and **CNDs-2**. Screening of synthetic parameters also supports the same conclusion, with an increase in **CNDs-2**  $g_{\text{abs}}$  observed at prolonged reaction times.

## Atomic Force Microscopy of CNDs-R-1

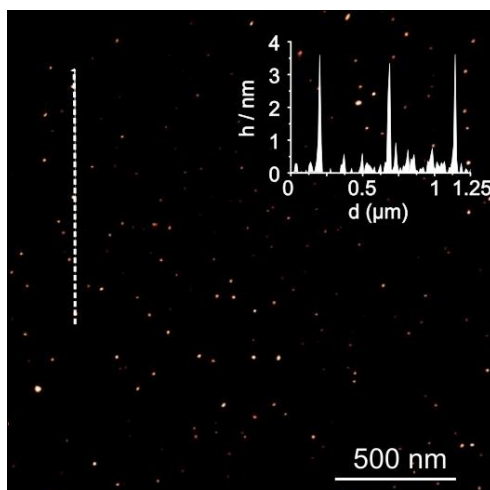

**Figure S6.** Tapping mode AFM of **CNDs-R-1** deposited on a mica substrate; inset is the height profile along the white dashed line.

## SUPPORTING INFORMATION

## Screening of doping agents

As a general procedure, the screening of different dopant agents was carried out following the same synthetic protocol of **CNDs-2**, replacing 1,4-benzoquinone with 2,3-dimethoxy-5-methyl-1,4-benzoquinone, 1,4-naphthoquinone or terephthalaldehyde.

**Table S1.** Mass and  $g_{\text{abs}}$  values obtained upon the addition of a dopant different from 1,4- benzoquinone.

| Modified dopant                         | mmol/mass added    | $g_{\text{abs}}^*(10^{-4})$ | Solid color | mass (mg) |
|-----------------------------------------|--------------------|-----------------------------|-------------|-----------|
| None                                    | 0.264 mmol/28.5 mg | 4.6 ( $\lambda=417$ nm)     | brown       | 41        |
| 2,3-dimethoxy-5-methyl-1,4-benzoquinone | 0.264 mmol/48 mg   | -6.8 ( $\lambda=291$ nm)    | brown       | 27        |
| 1,4-naphthoquinone                      | 0.264 mmol/41.7 mg | -2.3 ( $\lambda=285$ nm)    | brown       | 11        |
| Terephthalaldehyde <sup>a)</sup>        | 0.264 mmol/28 mg   | 5.4 ( $\lambda=291$ nm)     | yellow      | 54        |

<sup>a)</sup> This reaction was carried out using (*R*)-1,1'-binaphthyl-2,2'-diamine, the others with (*S*)-1,1'-binaphthyl-2,2'-diamine.

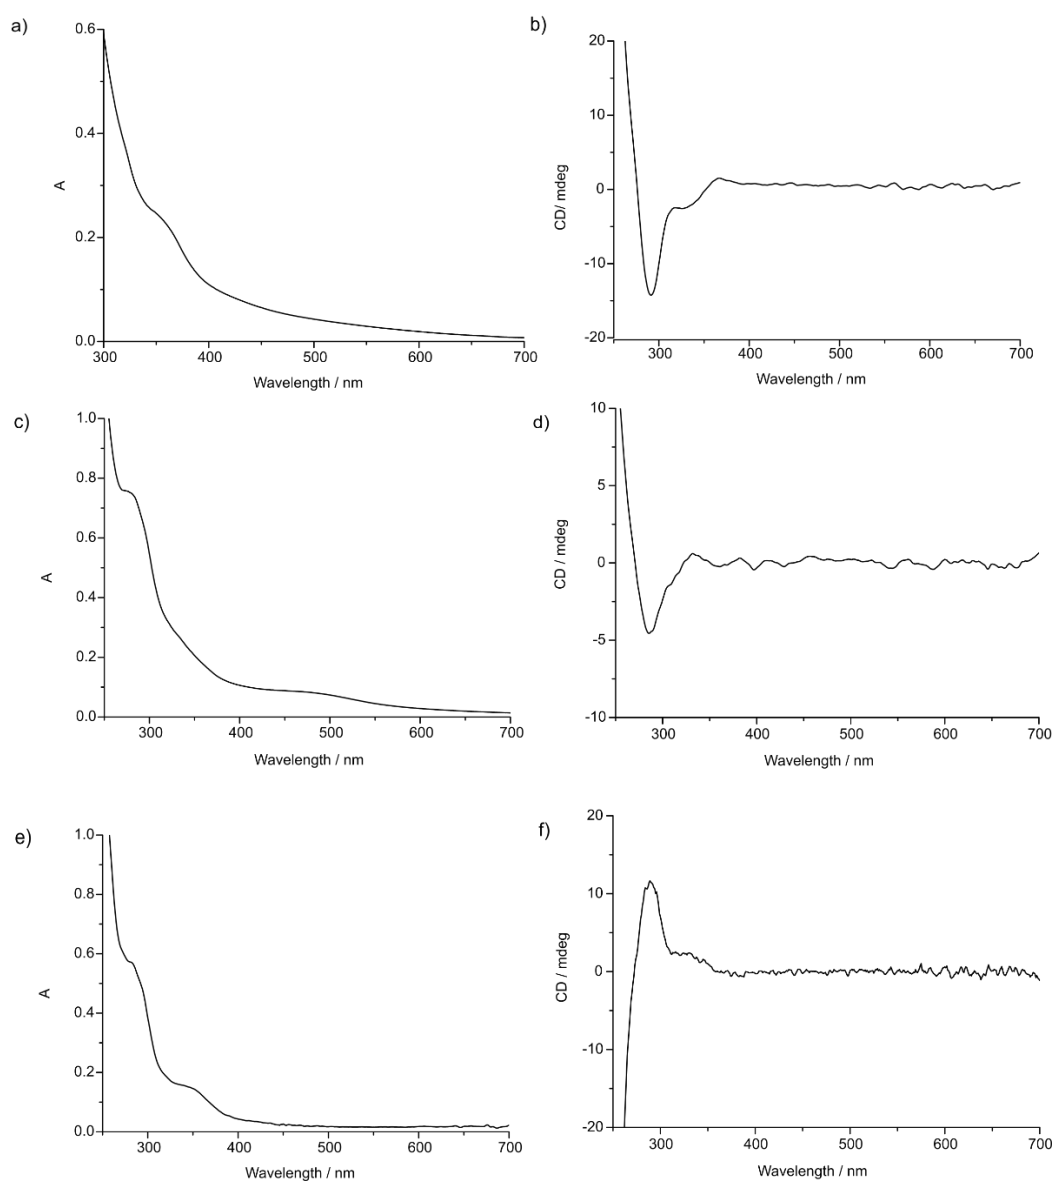

**Figure S7.** UV-Vis and ECD spectra of Carbon Nanodots from 2,3-dimethoxy-5-methyl-1,4-benzoquinone (a. and b.), 1,4-naphthoquinone (c. and d.) and terephthalaldehyde (e. and f.). Spectra recorded in  $\text{CHCl}_3$ .

## SUPPORTING INFORMATION

## Survey of synthetic parameters

As a general procedure, citric acid (76 mg, 0.396 mmol, 1.5 eq), (*S*)-1,1'-binaphthyl-2,2'-diamine (75 mg, 0.264 mmol, 1 eq.) and benzoquinone (28.5 mg, 0.264 mmol, 1 eq.) and were dissolved in *N,N*-dimethylformamide (DMF) (250  $\mu$ L) and then reacted at 240°C, 200 W for 300 seconds. In the process of microwave heating, the solution changes color from burgundy to dark brown as a result of formation of CNDs. The solution was diluted with DMF and filtered through a 0.1  $\mu$ m microporous membrane to remove possible large aggregates. The solution was collected and 50 mL of cold diethyl ether ( $\text{Et}_2\text{O}$ ) were added in order to induce CNDs' precipitation. The precipitate was filtered through a 0.1  $\mu$ m microporous membrane and washed with 50 mL of  $\text{Et}_2\text{O}$ , giving a brown solids. In the case of entry (E), microwave power was set at 300 W in order to reach a higher temperature.

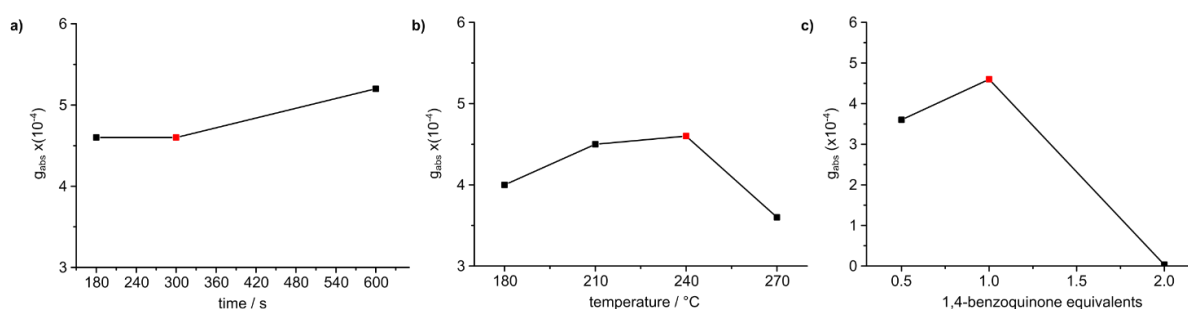

**Figure S8.** Trend of the  $g_{\text{abs}}$  calculated at 417 nm in function of (a) time, (b) temperature and (c) equivalents of 1,4-benzoquinone. Red squares indicate the standard synthesis conditions.

**Table S2.** Mass and  $g_{\text{abs}}$  values measured at 417 nm obtained upon modifying one synthetic parameter, either time, temperature or equivalents of 1,4-benzoquinone (BQ).

|                  | Modified parameter | Value (unit)               | $g_{\text{abs}} \times 10^{-4}$ | mass (mg) |
|------------------|--------------------|----------------------------|---------------------------------|-----------|
|                  | None               | 240 (°C), 200 (W), 300 (s) | 4.6                             | 41        |
| A.               | Time               | 180 (s)                    | 4.6                             | 40        |
| B.               | Time               | 600 (s)                    | 5.2                             | 43        |
| C.               | Temperature        | 180 (°C)                   | 4.0                             | 34        |
| D.               | Temperature        | 210 (°C)                   | 4.5                             | 32        |
| E.               | Temperature        | 270 (°C)                   | 3.6                             | 64        |
| F. <sup>a)</sup> | Amount of BQ       | 0.5 (equiv.)               | 3.6                             | 24        |
| G.               | Amount of BQ       | 2.0 (equiv.)               | 0.03                            | 65        |

<sup>a)</sup> This reaction was carried out using (*R*)-1,1'-binaphthyl-2,2'-diamine.



## SUPPORTING INFORMATION

## Size-Exclusion Chromatography analysis of CNDs-S-2

For Size-Exclusion Chromatography (SEC), a column packed with Sephadex LH-20 in *N,N*-dimethylformamide (DMF) operating at atmospheric pressure was employed. **CNDs-S-2** (19.4 mg) were dissolved in DMF (2 mL) and separated by SEC. Three fractions named SEC-fr1, SEC-fr2 and SEC-fr3 were obtained, according to their elution time. Finally, DMF was removed under reduced pressure, obtaining three oils. (SEC-fr1: 5.4 mg, SEC-fr2: 12.4 mg, SEC-fr3: 1.5 mg). All fractions display the typical excitation-dependent emission profile, with minor differences consistent with the presence of slightly different families of CNDs.<sup>S1</sup>

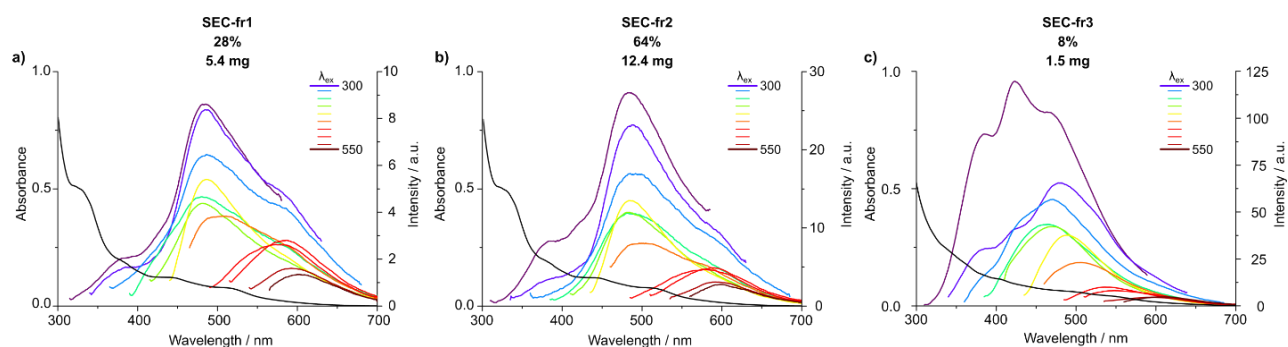

**Figure S9.** UV-Vis and fluorescence emission spectra of (a) SEC-fr1, (b) SEC-fr2 and (c) SEC-fr3 recorded at different excitation wavelengths. Experiments performed in  $\text{CHCl}_3$  at r.t.

## Morphological characterization of CNDs-R-2

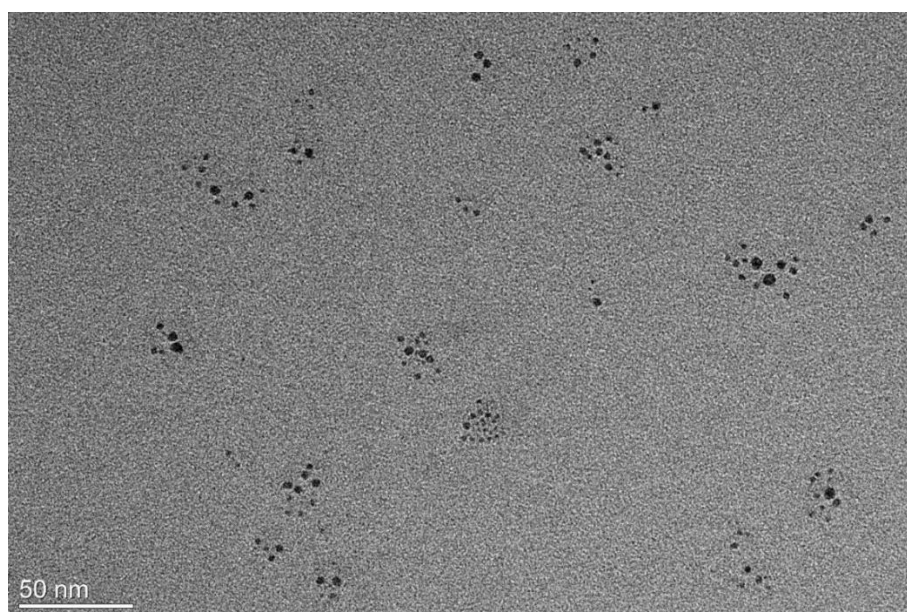

**Figure S10.** TEM image of CNDs-R-2.

## SUPPORTING INFORMATION

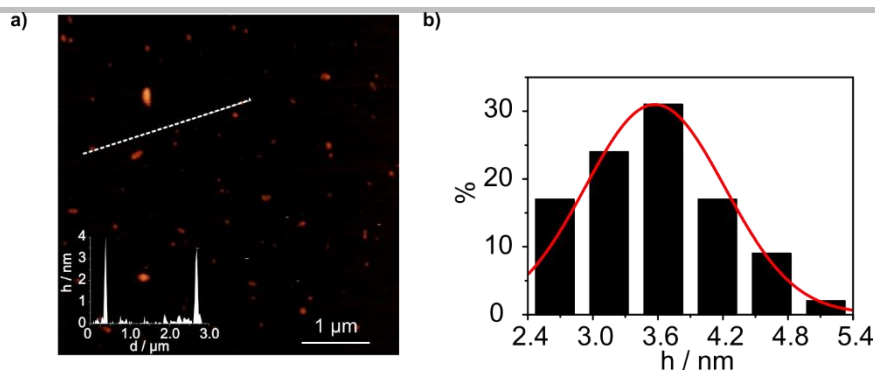

**Figure S11.** (a) Tapping mode AFM of **CNDs-R-2** deposited on a mica substrate; inset is the height profile along the white dashed line. (b) Size histogram of AFM height data, with distribution fit (red curve) based on a Gaussian distribution. **CNDs-R-2** possess a mean size of  $3.57 \pm 0.64$  nm, based on a statistic of 100 nanoparticles.

## X-Ray Photoelectron Spectroscopy of CNDs-2

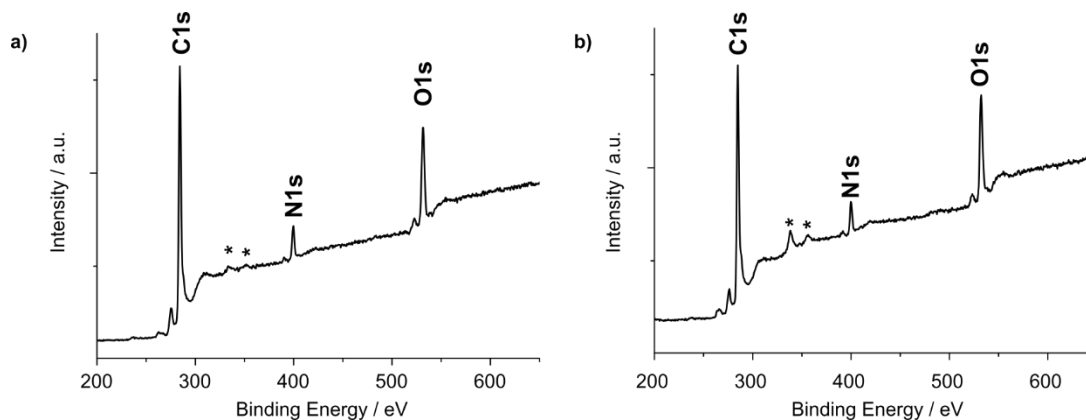

**Figure S12.** XPS survey of (a) **CNDs-R-2** and (b) **CNDs-S-2**, showing the C1s, N1s and O1s peaks (\* from gold substrate Au4d3, Au4d5 and Au4p).

## SUPPORTING INFORMATION

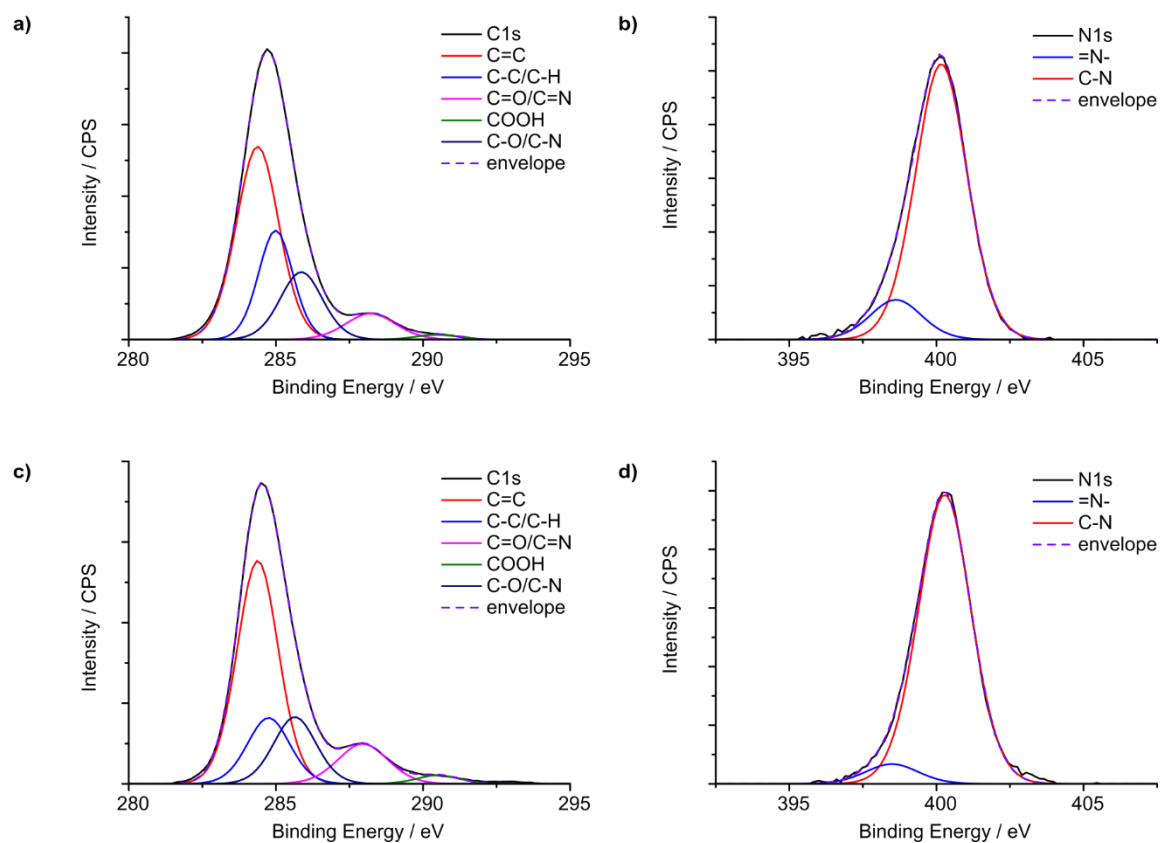

**Figure S13.** (a,b) Deconvoluted C1s and N1s spectra of **CNDs-R-2**; (c,d) deconvoluted C1s and N1s spectra of **CNDs-S-2**.

**Table S3.** XPS percentage of C, N, and O atoms and their deconvoluted components in **CNDs-R-2** and **CNDs-S-2** as determined by XPS measurements.

|           | <b>CNDs-R-2</b> | <b>CNDs-S-2</b> |
|-----------|-----------------|-----------------|
| <b>C%</b> | <b>81.9</b>     | <b>80.0</b>     |
| C=C       | 50.3            | 53.5            |
| C-C/C-H   | 23.0            | 16.3            |
| C=O/C=N   | 7.9             | 11.6            |
| COOH      | 1.2             | 2.1             |
| C-O/C-N   | 17.5            | 16.5            |
| <b>N%</b> | <b>5.6</b>      | <b>5.7</b>      |
| =N-       | 12.6            | 6.4             |
| C-N       | 87.4            | 93.6            |
| <b>O%</b> | <b>12.5</b>     | <b>14.3</b>     |

## SUPPORTING INFORMATION

## X-Ray Photoelectron Spectroscopy of CNDs-1

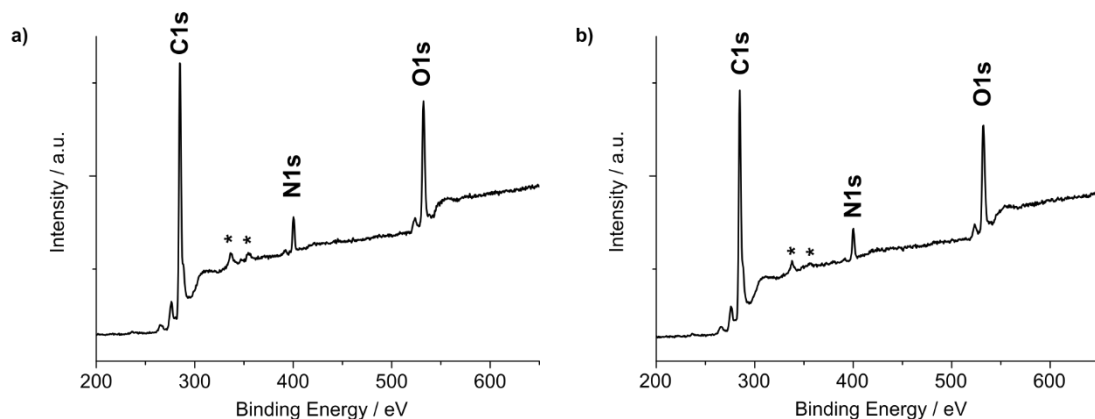

**Figure S14.** XPS survey of (a) CNDs-R-1, (b) CNDs-S-1 showing the C1s, N1s and O1s peaks (\* from gold substrate Au4d3, Au4d5 and Au4p).

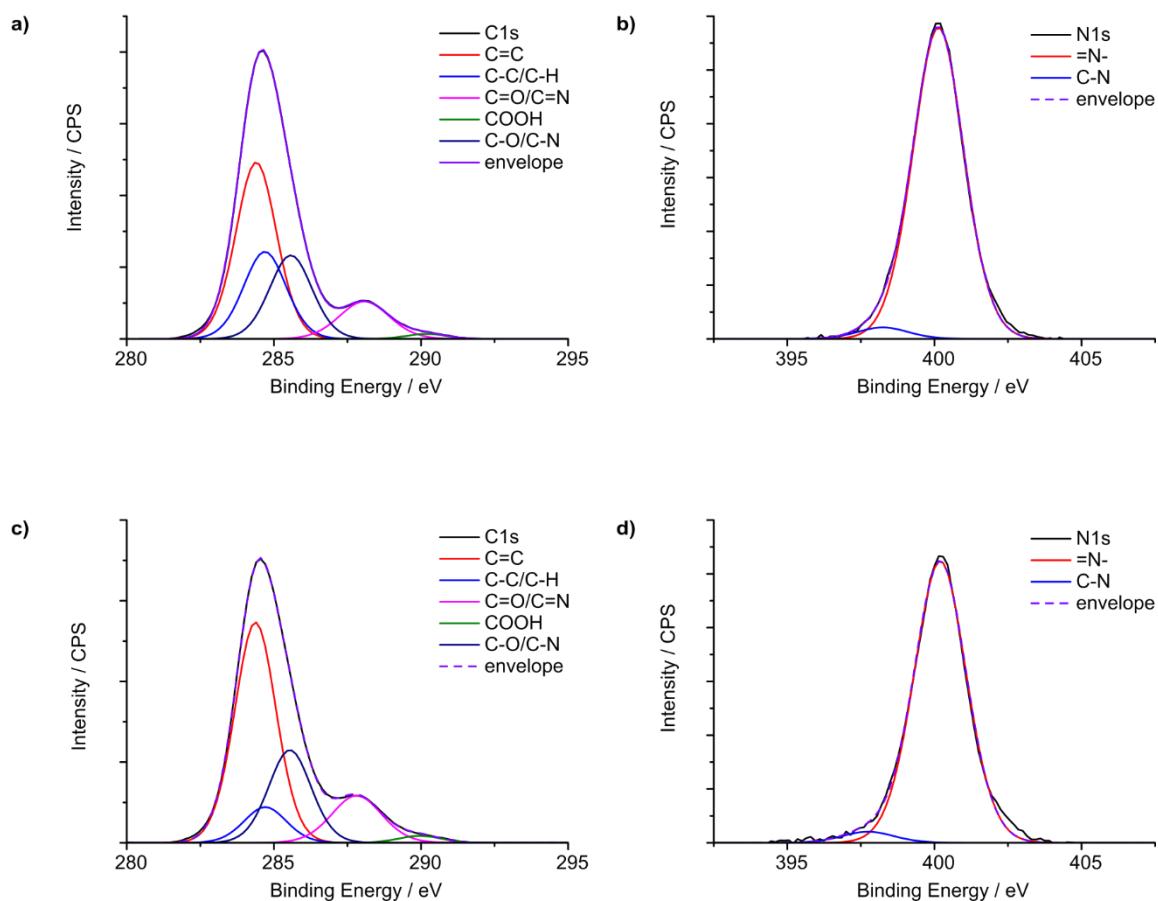

**Figure S15.** (a,b) Deconvoluted C1s and N1s spectra of CNDs-R-1; (c,d) deconvoluted C1s and N1s spectra of CNDs-S-1.

## SUPPORTING INFORMATION

**Table S4.** XPS percentage of C, N, and O atoms and their deconvoluted components in **CNDs-R-1** and **CNDs-S-1**, as determined by XPS measurements.

|           | <b>CNDs-R-1</b> | <b>CNDs-S-1</b> |
|-----------|-----------------|-----------------|
| <b>C%</b> | <b>80.4</b>     | <b>80.4</b>     |
| C=C       | 43.5            | 52.9            |
| C-C/C-H   | 22.4            | 8.8             |
| C=O/C=N   | 11.4            | 13.7            |
| COOH      | 1.2             | 1.7             |
| C-O/C-N   | 21.5            | 22.9            |
| <b>N%</b> | <b>5.3</b>      | <b>5.6</b>      |
| =N-       | 96.4            | 96.3            |
| C-N       | 3.6             | 3.7             |
| <b>O%</b> | <b>14.3</b>     | <b>14.0</b>     |

## Fourier-Transform Infrared Spectroscopy characterization

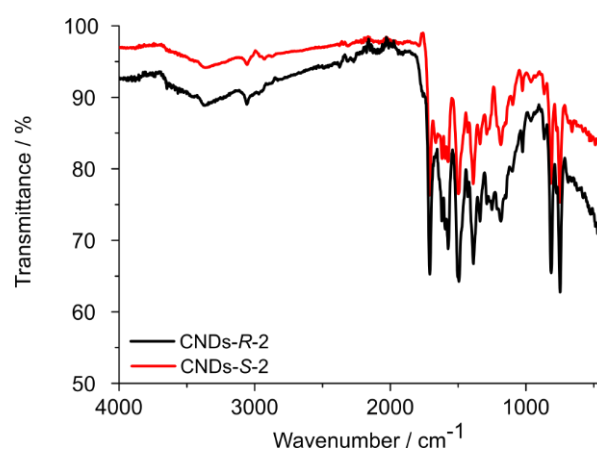**Figure S16.** ATR-FTIR spectra of **CNDs-R-2** (black line) and **CNDs-S-2** (red line).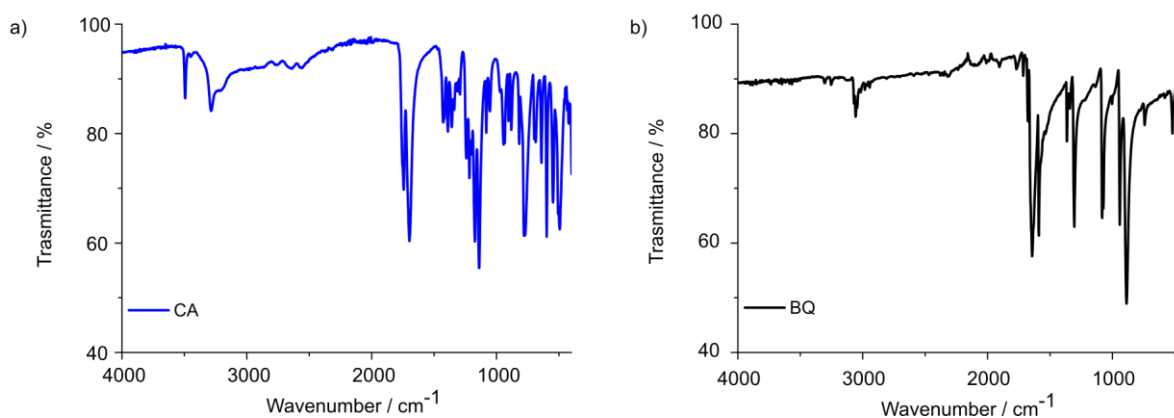**Figure S17.** ATR-FTIR spectra of molecular precursors (a) citric acid and (b) 1,4-benzoquinone.

## SUPPORTING INFORMATION

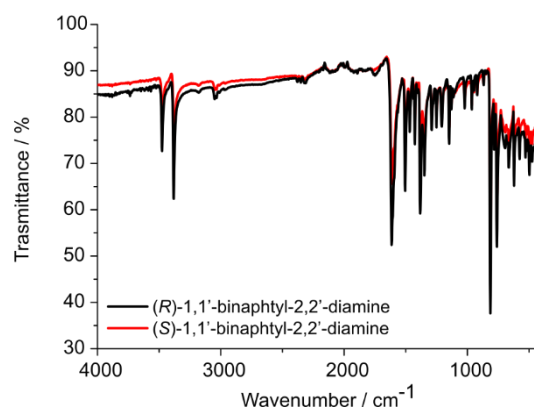

**Figure S18:** ATR-FTIR spectra of *R*- (black line) and *S*-1,1'-binaphthyl-2,2'-diamine (red line).

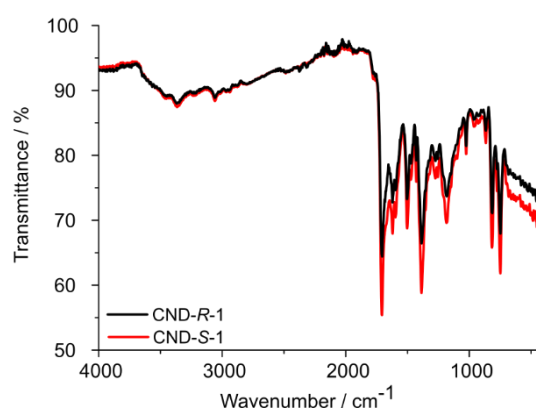

**Figure S19:** ATR-FTIR spectra of **CND-R-1** (black line) and **CND-S-1** (red line).

### Structural characterization of CNDs-R-2

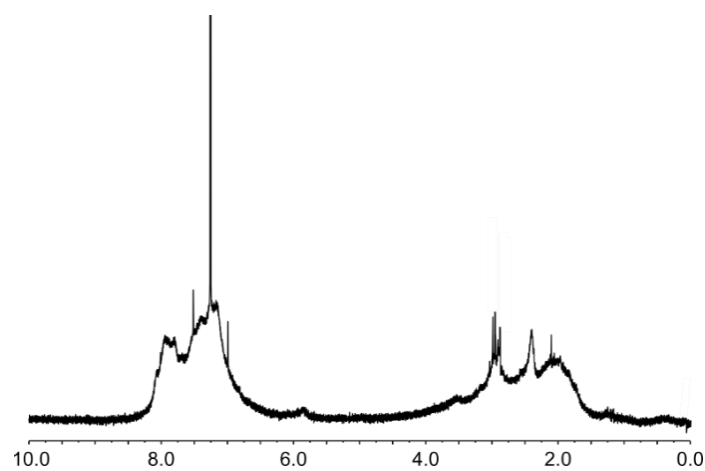

**Figure S20.** <sup>1</sup>H-NMR (CDCl<sub>3</sub>, 400 MHz, r.t.) of **CNDs-R-2**.

## SUPPORTING INFORMATION

Photophysical characterization of **CNDs-2** in multiple solvents**Table S5.** Values of  $g_{\text{abs}}$ ,  $\lambda_{\text{em}}$ , and  $\tau_{\text{ave}}$  obtained for **CNDs-2** in different solvents. Polarity indexes  $E_T^N$  are taken from ref. [4].

| Solvent         | $E_T^N$ | $ g_{\text{abs}}  (\times 10^{-4})$ | $\lambda_{\text{em}}$ | $\tau_{\text{ave}}$ |
|-----------------|---------|-------------------------------------|-----------------------|---------------------|
| $\text{CHCl}_3$ | 0.259   | 4.6                                 | 480                   | 2.09                |
| DCM             | 0.309   | 4.9                                 | 484                   | 2.60                |
| DMF             | 0.386   | 6.0                                 | 479                   | 2.58                |
| DMSO            | 0.444   | 5.8                                 | 482                   | 3.04                |
| EtOH            | 0.654   | 6.0                                 | 484                   | 1.71                |

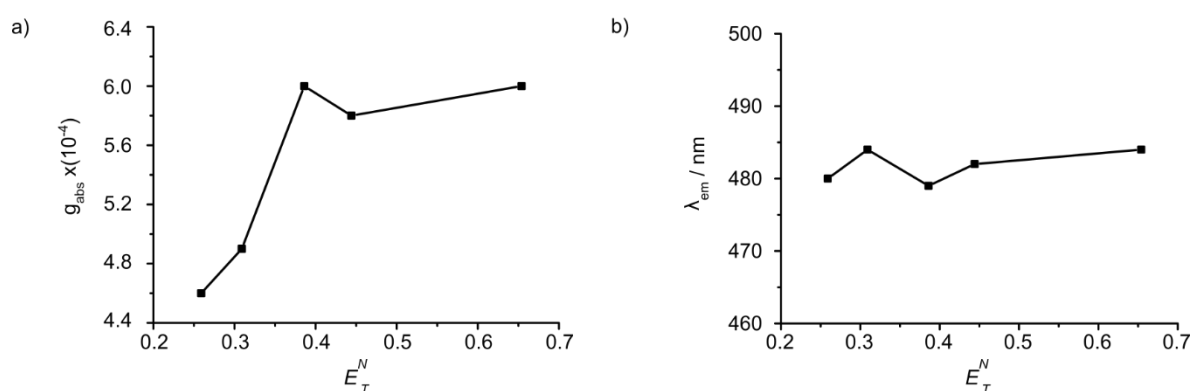**Figure S21:** Plots of  $g_{\text{abs}}$  (at 417 nm) vs  $E_T^N$  (left) and  $\lambda_{\text{em}}^{\text{max}}$  vs  $E_T^N$  (right).Optical characterization of **CNDs-R-2**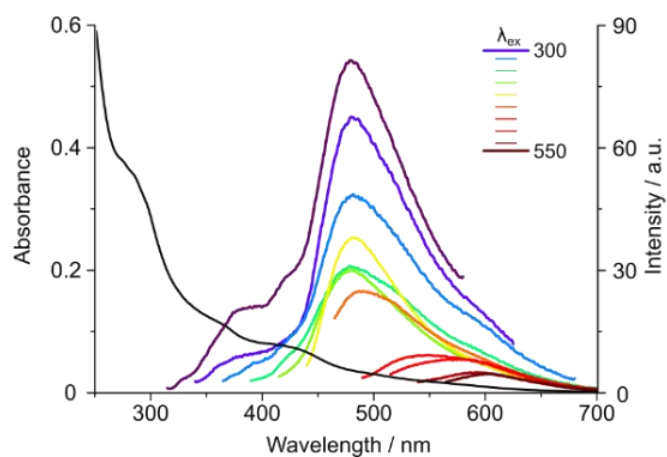**Figure S22.** UV-Vis and fluorescence emission spectra of **CNDs-R-2** recorded at different excitation wavelengths. Experiments were performed in  $\text{CHCl}_3$  at r.t. at concentrations between 0.05 and 0.01 mg/mL.

## SUPPORTING INFORMATION

Chiroptical characterization of *R*- and *S*-1,1'-binaphthyl-2,2'-diamine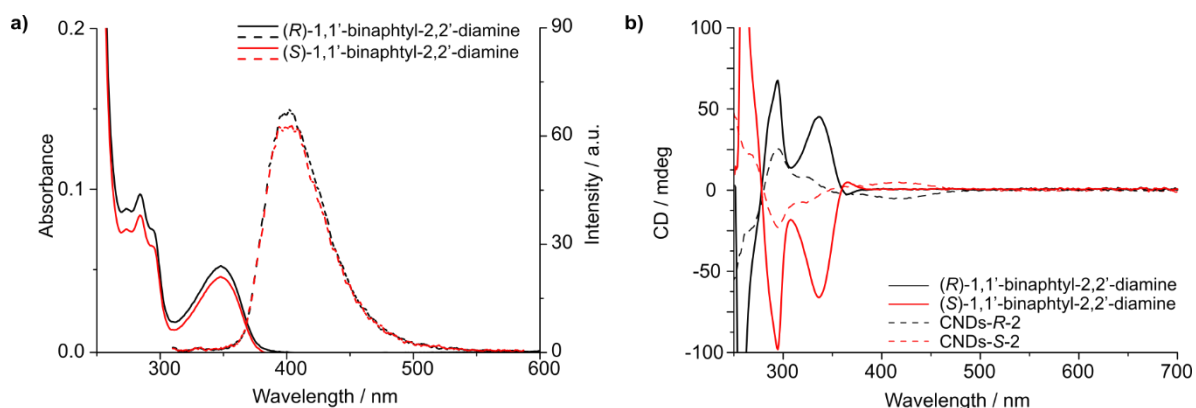

**Figure S23.** (a) UV-Vis spectra (solid lines) and fluorescence emission spectra (dashed lines) of (*R*)- (black line) and (*S*)-1,1'-binaphthyl-2,2'-diamine (red line). Fluorescence emission spectra are recorded at  $\lambda_{ex}$ =300 nm, with a maximum peak at  $\lambda_{em}$ =400 nm. (b) ECD spectra of (*R*)- (black solid line) and (*S*)-1,1'-binaphthyl-2,2'-diamine (red solid line). As reference, ECD spectra of **CNDs-R-2** (black dashed line) and **CNDs-S-2** (red dashed line) are reported. Experiments performed in  $\text{CHCl}_3$  at r.t..

## Quantum Yield measurements of CNDs-2

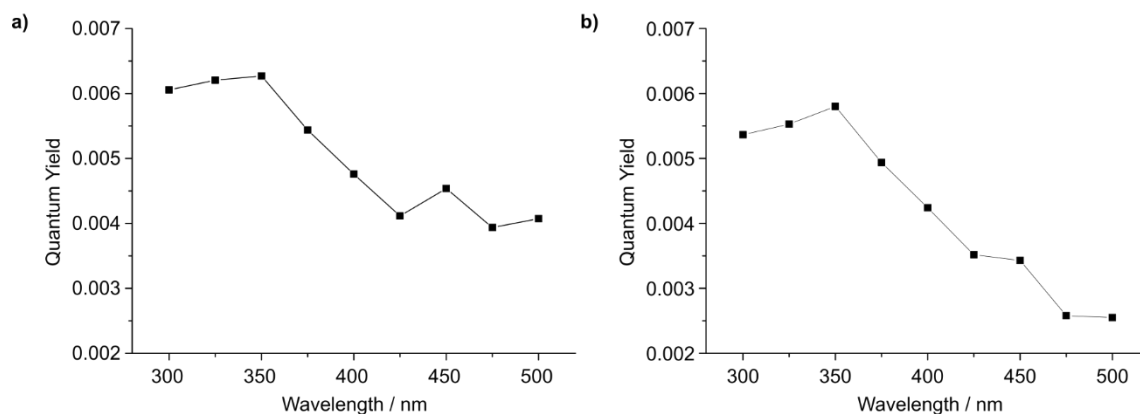

**Figure S24.** Quantum yield of (a) **CNDs-S-2** and (b) **CNDs-R-2** measured upon changing the excitation wavelength.

 $g_{lum}$  measurements of CNDs-2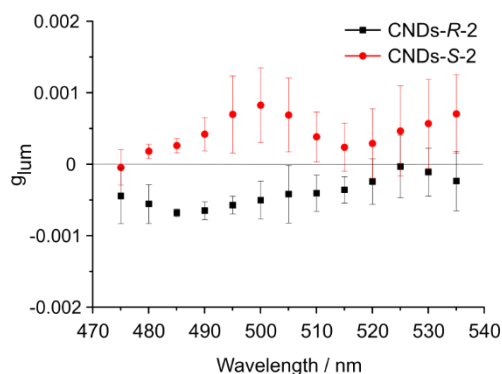

**Figure S25.**  $g_{lum}$  of **CNDs-R-2** (black circle points) and **CNDs-S-2** (red circle points) vs wavelength. Note that  $g_{lum}$  is noisy on the spectral edges where emission intensity becomes vanishing small.



## SUPPORTING INFORMATION

## Circularly Polarized Luminescence of CNDs-2 in DMF

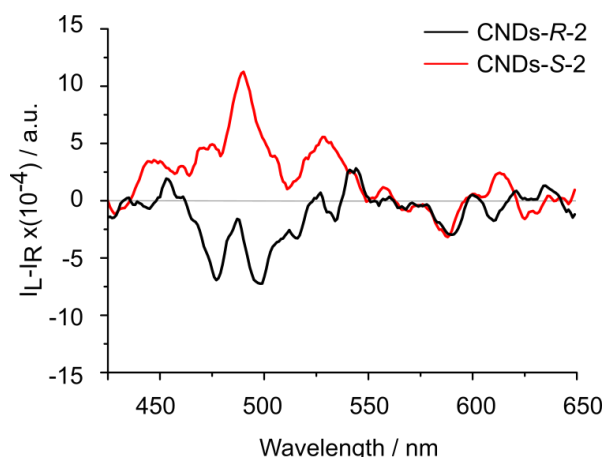

**Figure S26.** CPL spectra of **CNDs-R-2** (black line) and **CNDs-S-2** (red line) in DMF, excited at 365 nm.

**Synthesis of Carbon Nanodots in absence of chiral diamine (CNDs-BQ)**

Citric acid (76 mg, 0.396 mmol, 1.5 eq) and benzoquinone (28.5 mg, 0.264 mmol, 1 eq.) were dissolved in N,N-dimethylformamide (DMF) (250  $\mu$ L) and then heated at 240°C, 200 W for 300 seconds. In the process of microwave heating, the solution changes color from yellow to brown as a result of formation of CNDs. The solution was diluted with DMF and filtered through a 0.1  $\mu$ m microporous membrane to remove possible large aggregates. The solution was collected and 50 mL of cold diethyl ether ( $\text{Et}_2\text{O}$ ) were added in order to induce CNDs' precipitation. The precipitate was filtered through a 0.1  $\mu$ m microporous membrane and washed with 50 mL of  $\text{Et}_2\text{O}$ , giving a black solid (11 mg). Due to poor solubility of **CNDs-BQ** in  $\text{CHCl}_3$ , the optical characterization was performed in DMSO.

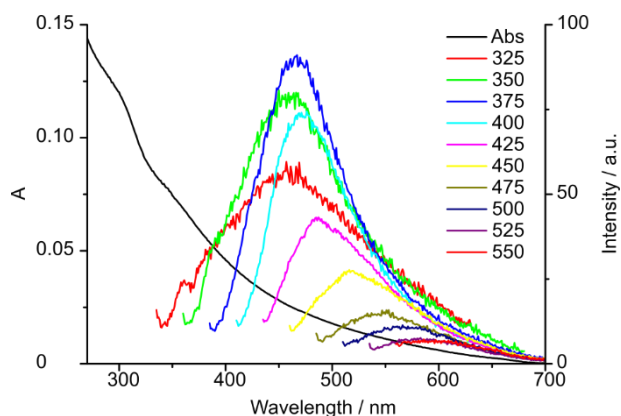

**Figure S27.** UV-Vis absorption and emission spectra of **CNDs-BQ** recorded in DMSO. The excitation wavelengths are shown inside the figure.

## SUPPORTING INFORMATION

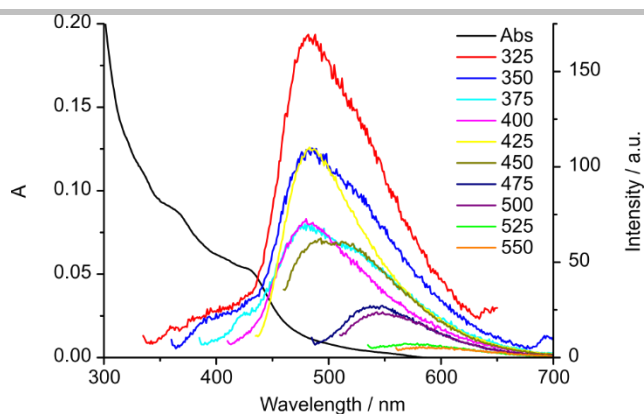

**Figure S28.** UV-Vis absorption and emission spectra of **CNDs-S** recorded in DMSO. The excitation wavelengths are shown inside the figure.

**Circularly Polarized Luminescence of *R*- and *S*-1,1'-binaphthyl-2,2'-diamine**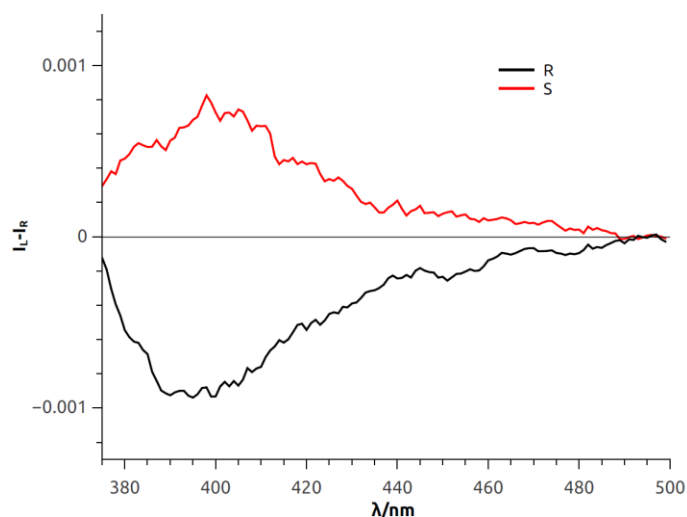

**Figure S29.** CPL spectra of (*R*)- (black line) and (*S*)-1,1'-binaphthyl-2,2'-diamine (red line) in  $\text{CH}_2\text{Cl}_2$ , excited at 365 nm.

**Thermogravimetric analysis of CNDs-R-2**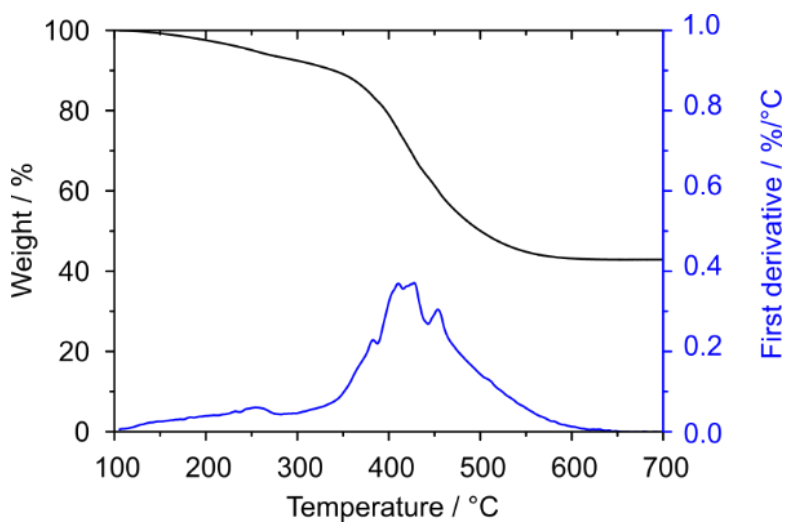

**Figure S30.** Thermogravimetric analysis of **CNDs-R-2** (black line) and its first derivative (blue line).

## SUPPORTING INFORMATION

## Lifetime measurements of CNDs-2

In both figures, the yellow curve corresponds to the sample fluorescence decay, the blue curve corresponds to the Instrument Response function – used to fit the fluorescence decays – and the magenta curve corresponds to the best fit, with their respective residuals (green line).

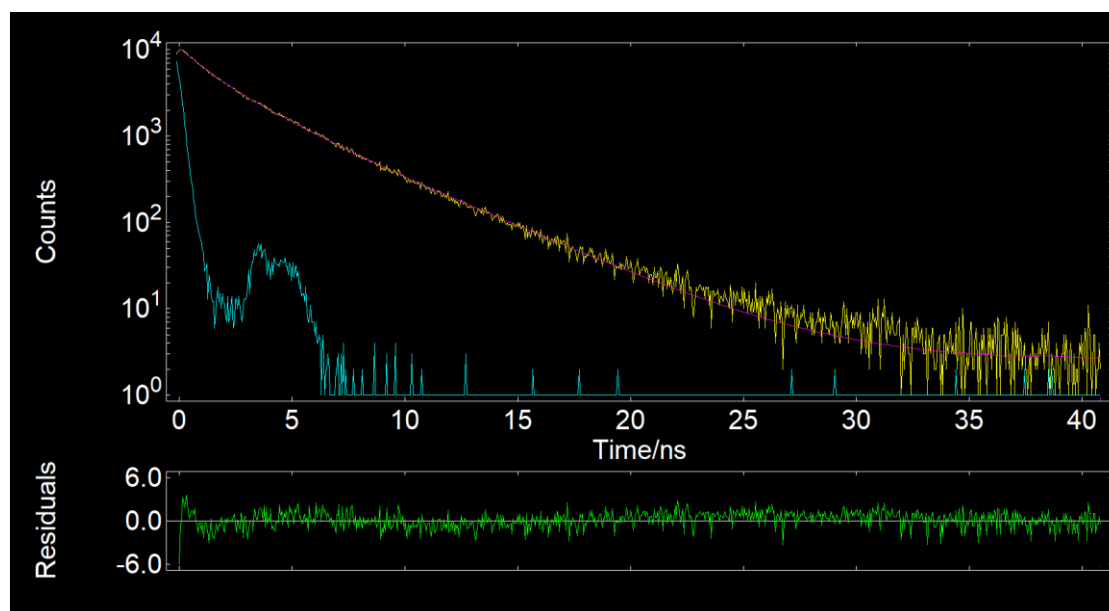

**Figure S31.** Fluorescence decay curve of **CNDs-R-2** in CH<sub>2</sub>Cl<sub>2</sub> ( $\lambda_{\text{exc}} = 375 \text{ nm}$ ,  $\lambda_{\text{em}} = 490 \text{ nm}$ ).

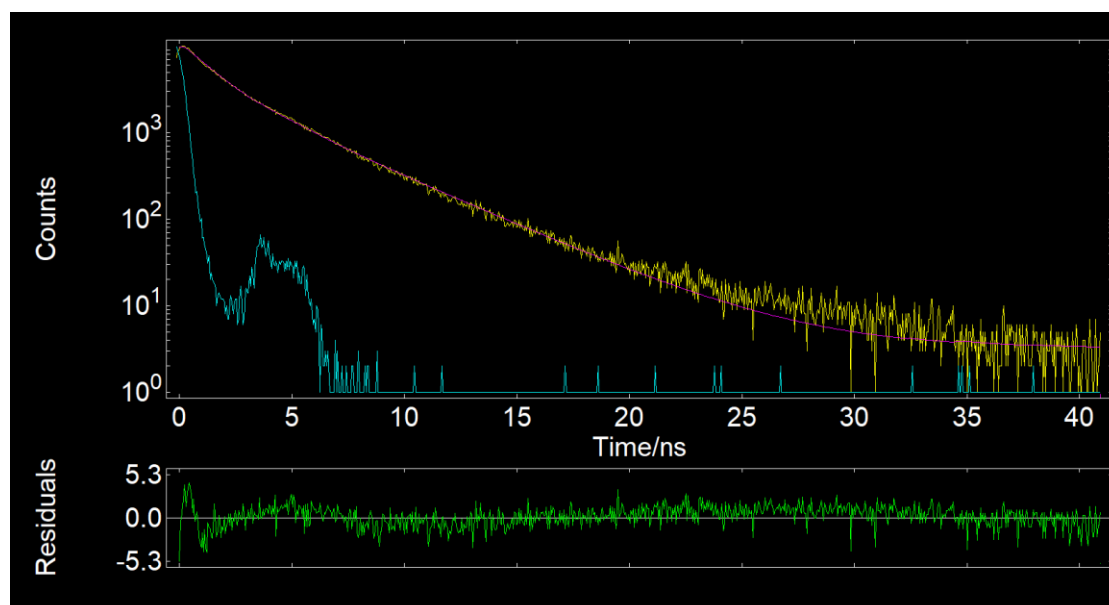

**Figure S32.** Fluorescence decay curve of **CNDs-S-2** in CH<sub>2</sub>Cl<sub>2</sub> ( $\lambda_{\text{exc}} = 375 \text{ nm}$ ,  $\lambda_{\text{em}} = 490 \text{ nm}$ ).

**Table S6.** Fitting parameters of the fluorescence decay curves.

| Sample   | A <sub>1</sub> | $\tau_1 \pm 0.1 \text{ (ns)}$ | A <sub>2</sub> | $\tau_2 \pm 0.1 \text{ (ns)}$ | $\tau_{\text{ave}} \text{ (ns)}$ |
|----------|----------------|-------------------------------|----------------|-------------------------------|----------------------------------|
| CNDs-R-2 | 0.07           | 1.51                          | 0.03           | 3.86                          | 2.74                             |
| CNDs-S-2 | 0.07           | 1.36                          | 0.03           | 3.86                          | 2.73                             |

SUPPORTING INFORMATION

---

**References**

- [1] F. Arcudi, L. Dordevic, M. Prato, *Angew. Chem. Int. Ed.* 2016, 55 (6), 2107–2112.  
[2] F. Zinna, T. Bruhn, C. A. Guido, J. Ahrens, M. Bröring, L. Di Bari, G. Pescitelli, *Chem. Eur. J.* 2016, 22, 16089-16098.  
[3] T. Kinuta, N. Tajima, M. Fujiki, M. Miyazawa, Y. Imai, *Tetrahedron* 2012, 68, 4791-4796.  
[4] C. Reicherd, *Chem. Rev.* 1994, 94, 2319-2358

**Author Contributions****Investigation**

SDN Lead, FA Equal, FZ Equal, GR Support

**Validation**

GR Lead, MP Lead, FZ Lead, LDB Lead

**Writing original**

GR Lead, FZ Lead, SDN Lead

**Writing review and editing**

MP Lead, LDB Lead, FA Support

**Funding**

LDB Lead, MP Lead
